# Supplementary material for: Ice-buttressing-controlled rock slope failure on a cirque headwall, Lake District, UK
Source: Copernicus journal article supplement (doi:10.5194/esurf-11-817-2023), 2023-08-17
Supplement: Supplementary file 1 [file esurf-11-817-2023-supplement.zip]

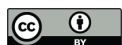

*Supplement of*

## **Ice-buttressing-controlled rock slope failure on a cirque headwall, Lake District, UK**

**Paul A. Carling et al.**

*Correspondence to:* Paul A. Carling ([p.a.carling@soton.ac.uk](mailto:p.a.carling@soton.ac.uk))

- [esurf-11-817-2023-supplement-title-page.pdf](#)
- [Carling et al RSF Supplement July 2023.docx](#)

The copyright of individual parts of the supplement might differ from the article licence.
