# Supplementary material for: Ice-buttressing-controlled rock slope failure on a cirque headwall, Lake District, UK
Source: Copernicus journal article supplement (doi:10.5194/esurf-11-817-2023), 2023-08-17
Supplement: Supplementary file 2 [file esurf-11-817-2023-supplement.zip]

Archive with 2 entries (2 files):
- Carling et al RSF Supplement July 2023.docx
- esurf-11-817-2023-supplement-title-page.pdf
